# Supplementary material
Source: MDPI journal article supplement (https://www.mdpi.com/2073-4352/8/2/94)
Supplement: s1 [file s1]

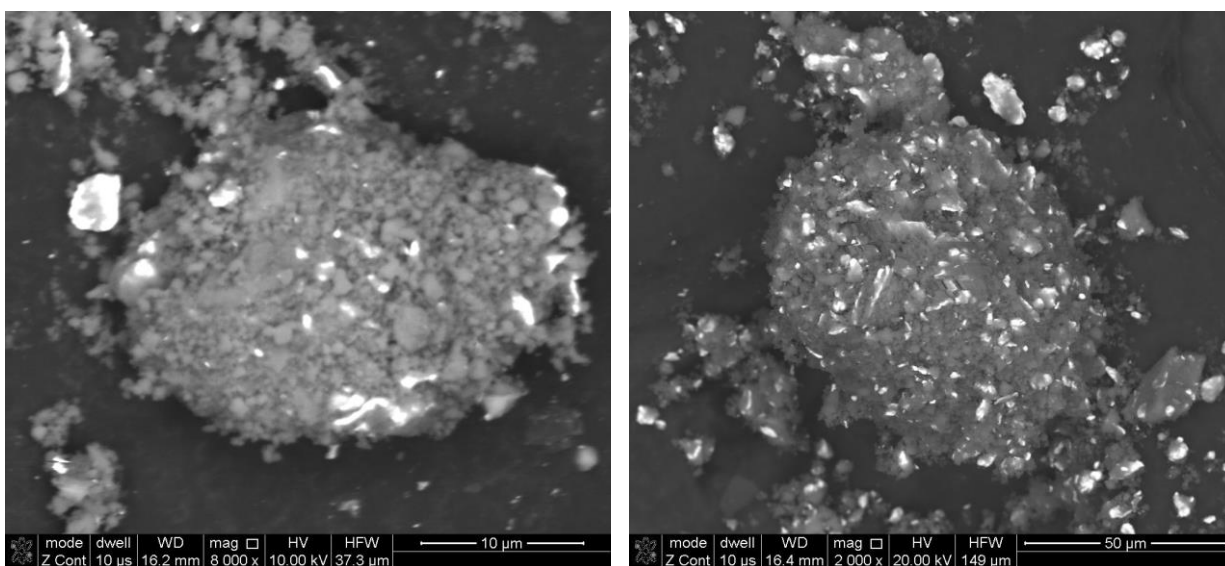

Figure 1S. SEM images of  $\text{MgH}_2+\text{Fe}$  powders milled for 30 min and sintered at 300 °C under hydrogen pressure.

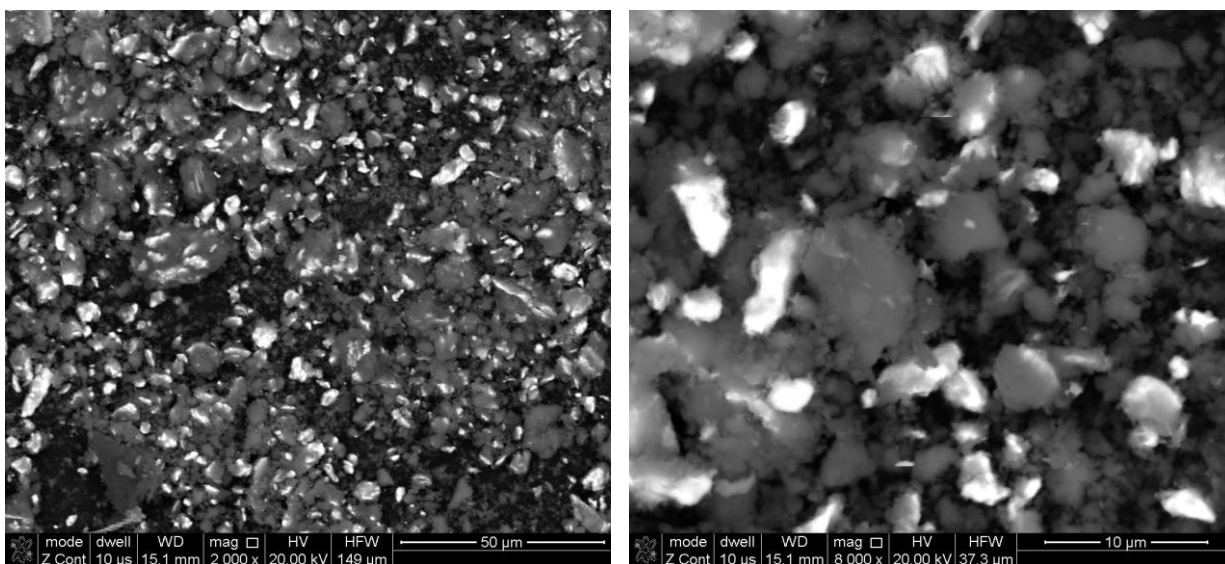

Figure 2S. SEM images of  $\text{MgH}_2+\text{Fe}$  powders milled for 30 min and sintered at 350 °C under hydrogen pressure.

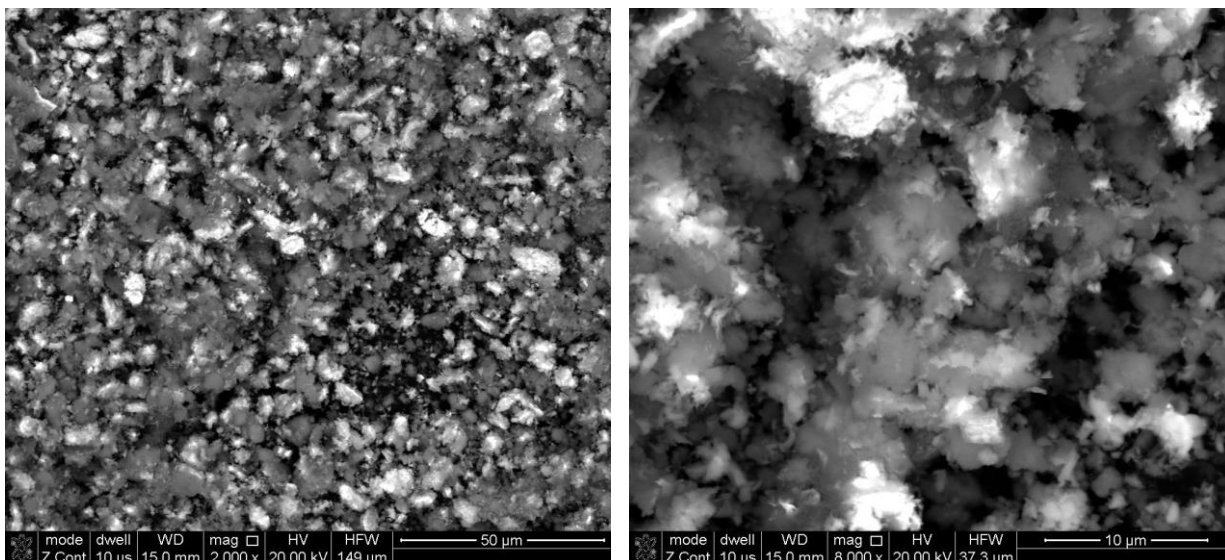

Figure 3S. SEM images of  $\text{MgH}_2+\text{Fe}$  powders milled for 30 min and sintered at 400 °C under hydrogen pressure.

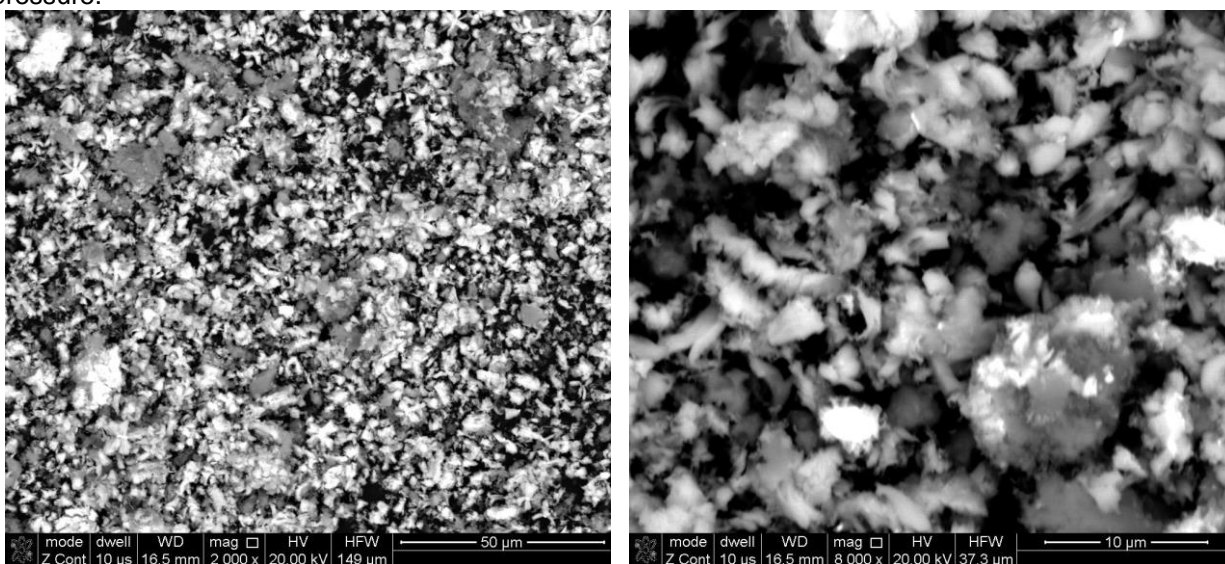

Figure 4S. SEM images of  $\text{MgH}_2+\text{Fe}$  powders milled for 30 min and sintered at 450 °C under hydrogen pressure.

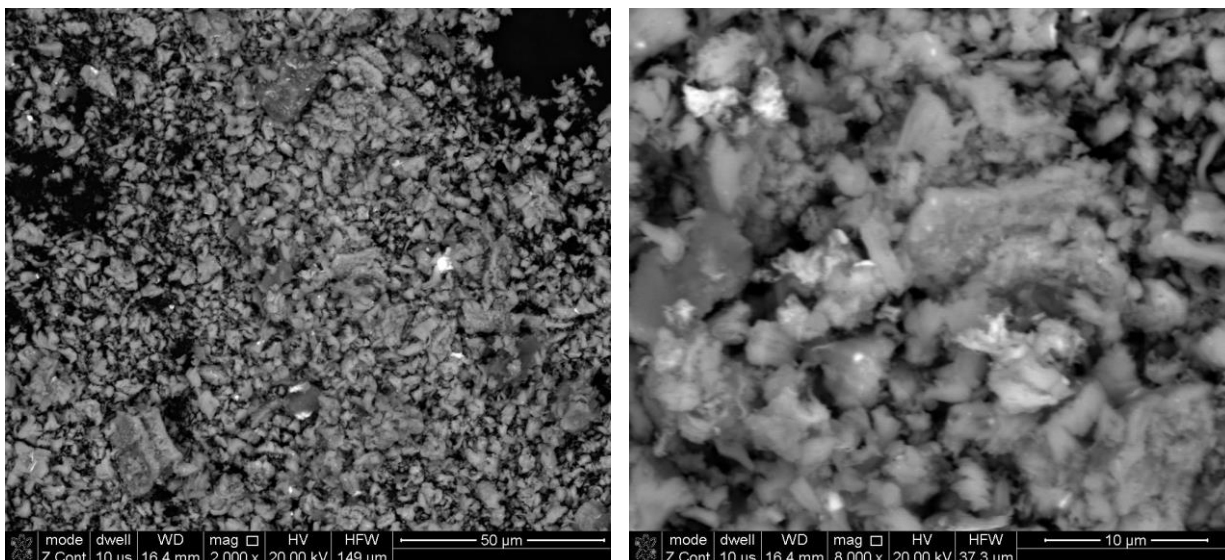

Figure 5S. SEM images of  $\text{MgH}_2+\text{Fe}$  powders milled for 30 min and sintered at 500 °C under hydrogen pressure.

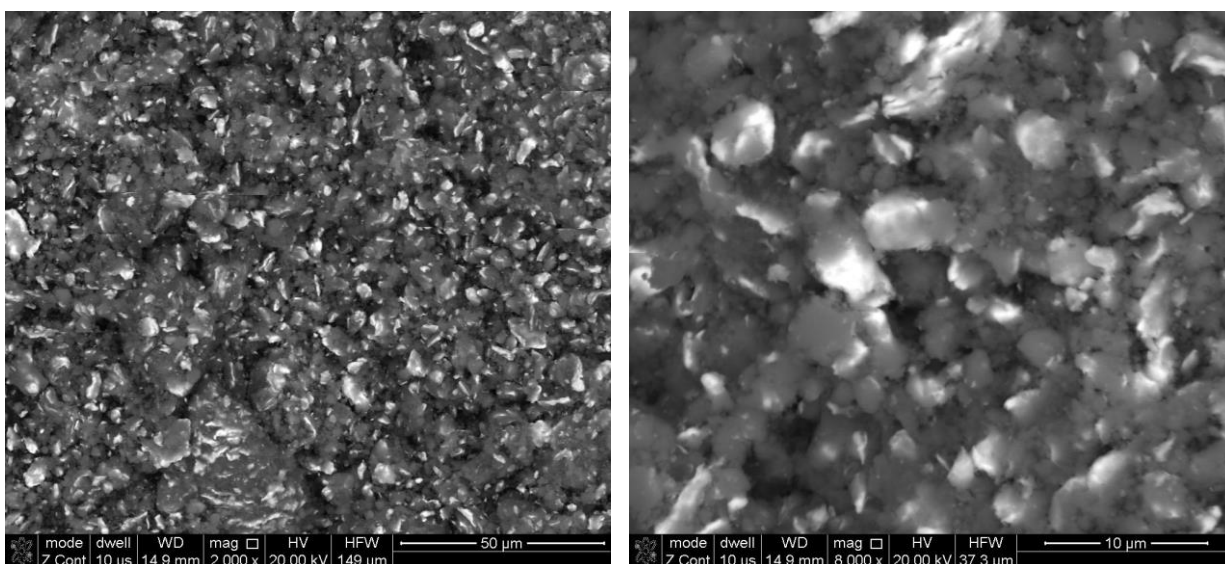

Figure 6S. SEM images of  $\text{MgH}_2+\text{Fe}$  powders milled for 1 h and sintered at 300 °C under hydrogen pressure.

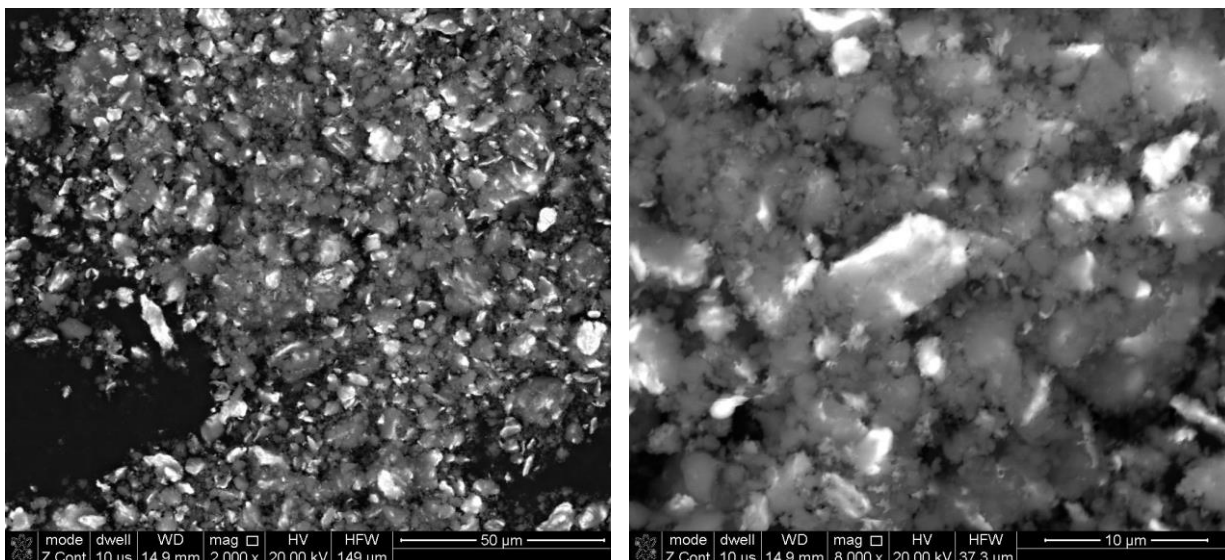

Figure 7S. SEM images of  $\text{MgH}_2+\text{Fe}$  powders milled for 1h and sintered at 350 °C under hydrogen pressure.

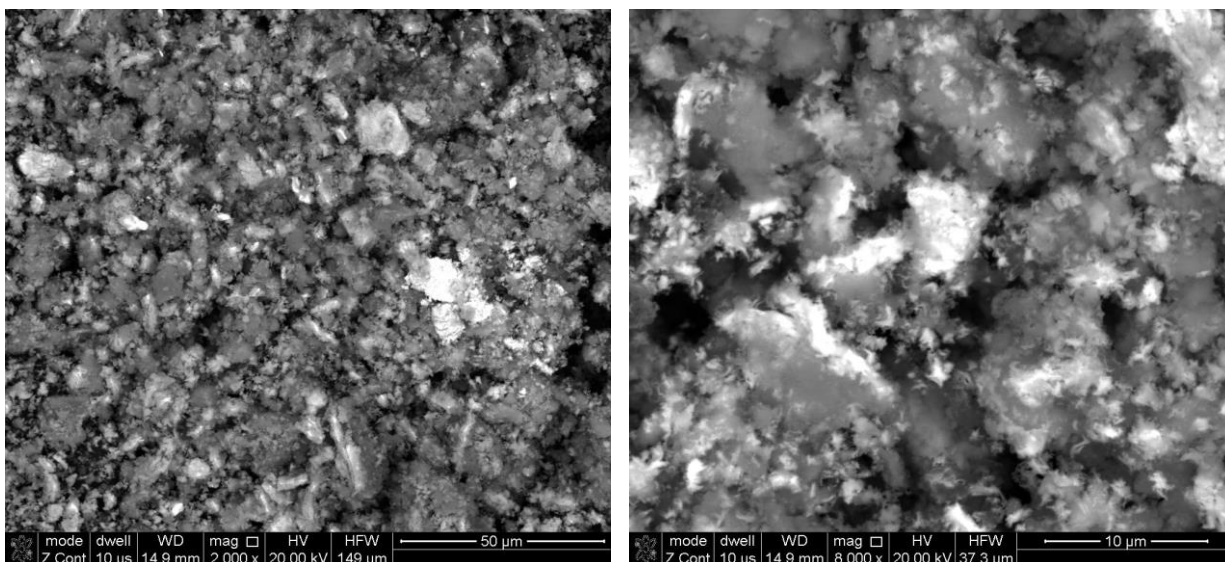

Figure 8S. SEM images of  $\text{MgH}_2+\text{Fe}$  powders milled for 1h and sintered at 400 °C under hydrogen pressure.

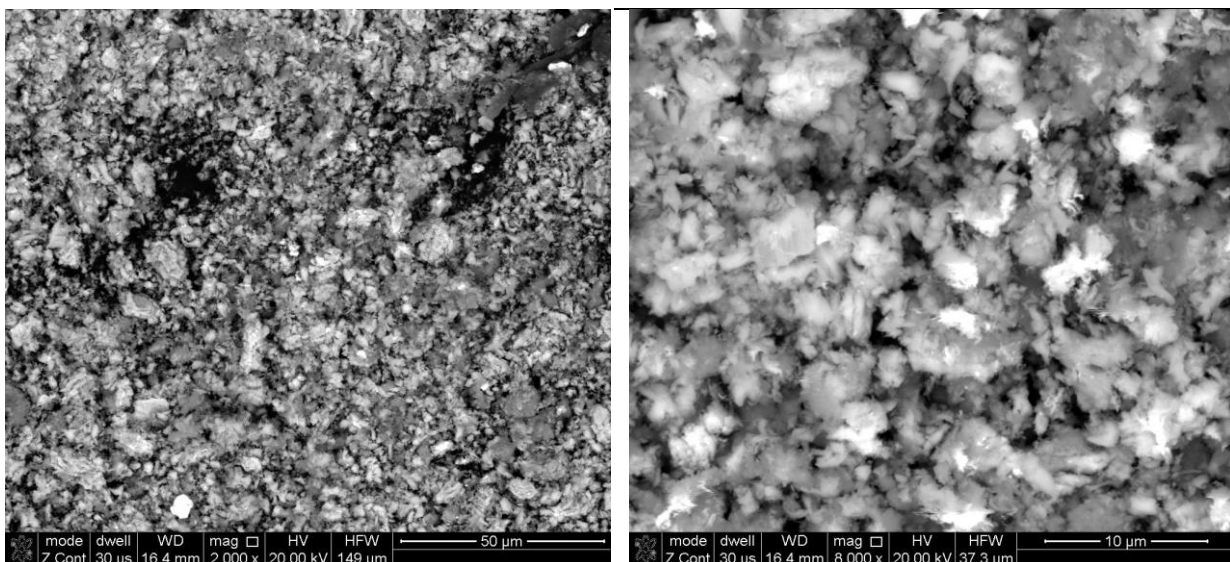

Figure 9S. SEM images of  $\text{MgH}_2+\text{Fe}$  powders milled for 1h and sintered at 450 °C under hydrogen pressure.

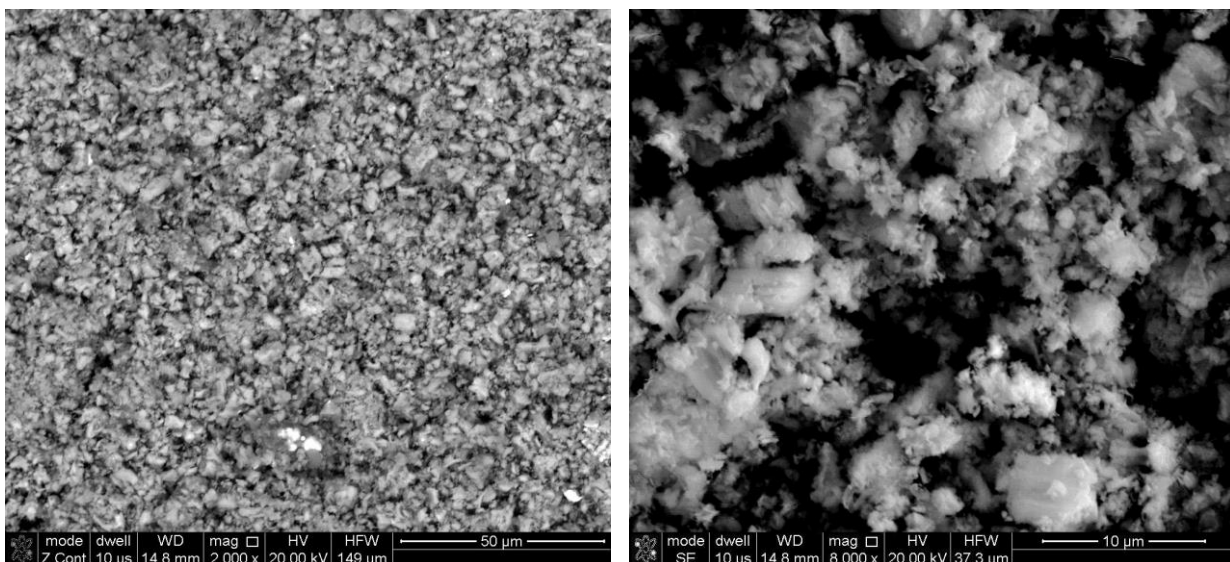

Figure 10S. SEM images of  $\text{MgH}_2+\text{Fe}$  powders milled for 1h and sintered at 500 °C under hydrogen pressure.

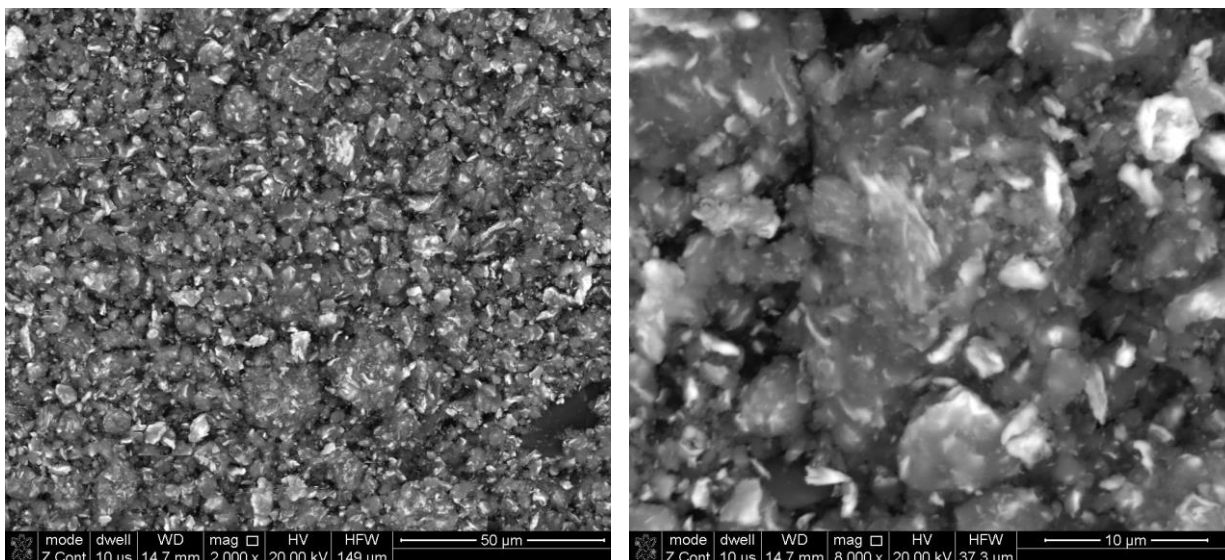

Figure 11S. SEM images of  $\text{MgH}_2+\text{Fe}$  powders milled for 2h and sintered at 300 °C under hydrogen pressure.

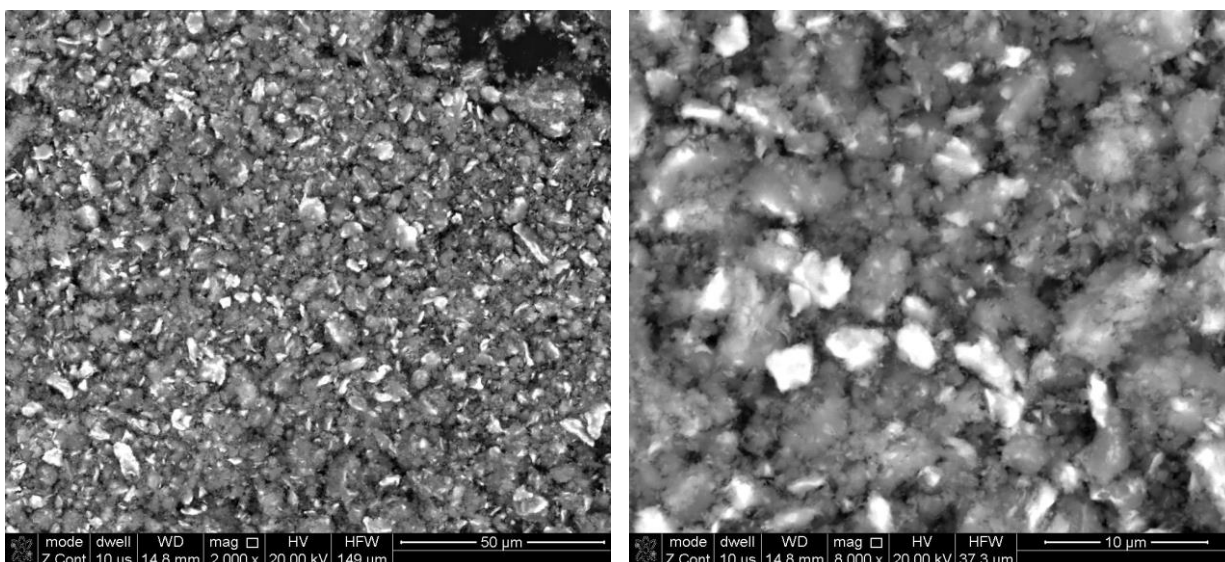

Figure 12S. SEM images of  $\text{MgH}_2+\text{Fe}$  powders milled for 2h and sintered at 350 °C under hydrogen pressure.

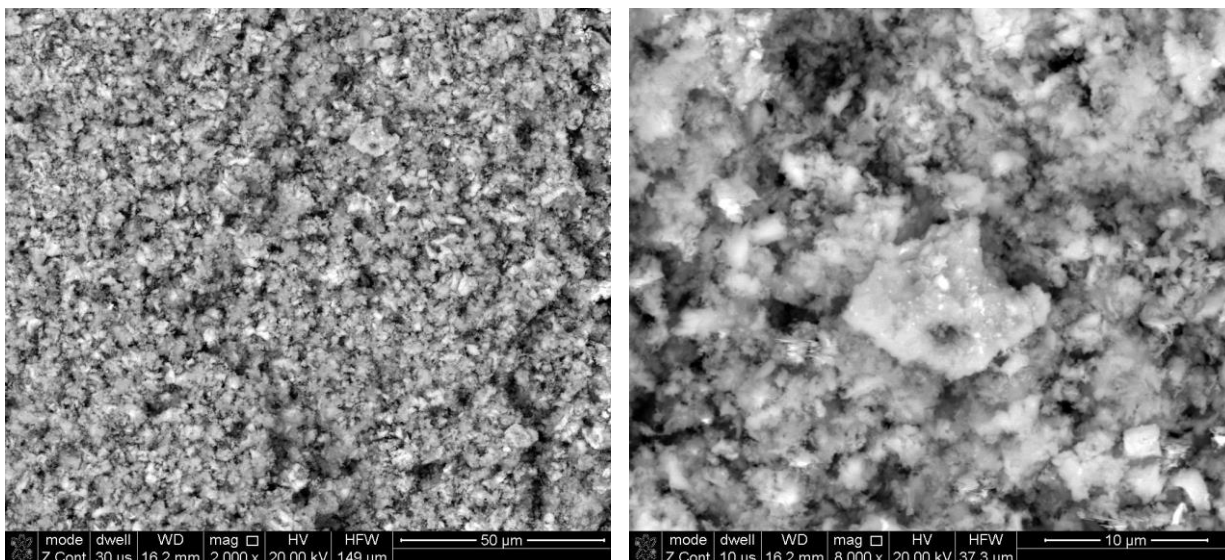

Figure 13S. SEM images of  $\text{MgH}_2+\text{Fe}$  powders milled for 2h and sintered at 400 °C under hydrogen pressure.

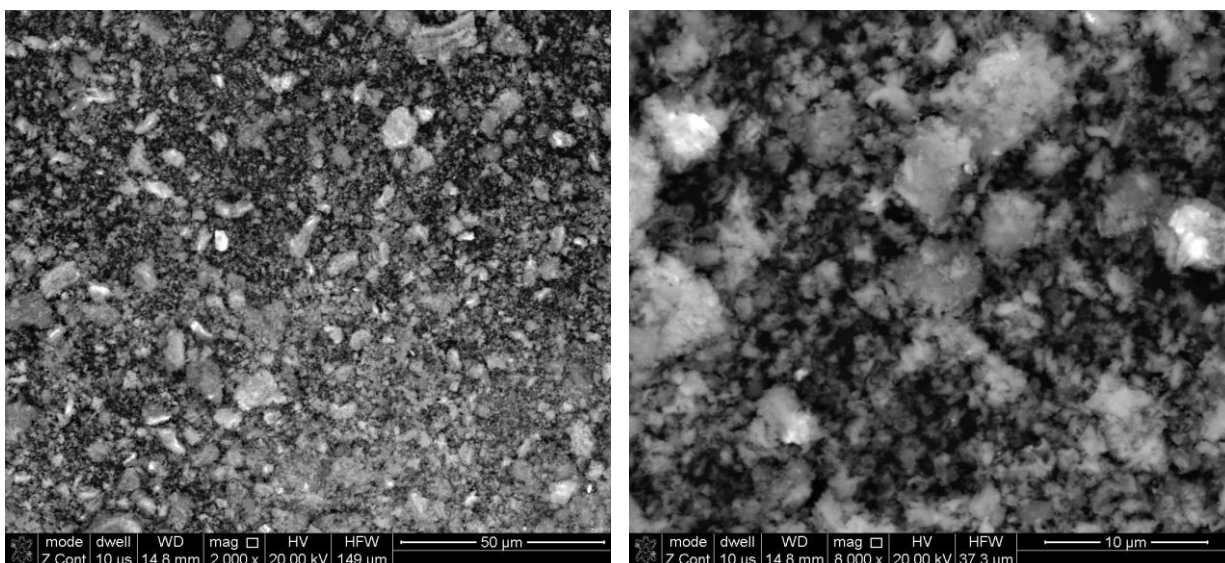

Figure 14S. SEM images of  $\text{MgH}_2+\text{Fe}$  powders milled for 2h and sintered at 450 °C under hydrogen pressure.

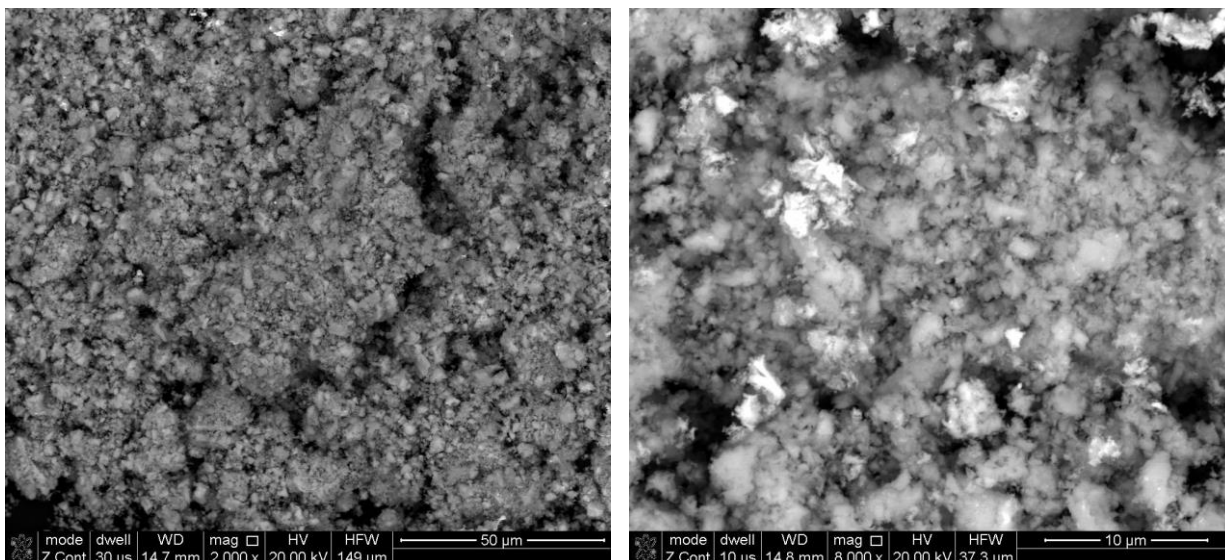

Figure 15S. SEM images of  $\text{MgH}_2+\text{Fe}$  powders milled for 2h and sintered at 500 °C under hydrogen pressure.

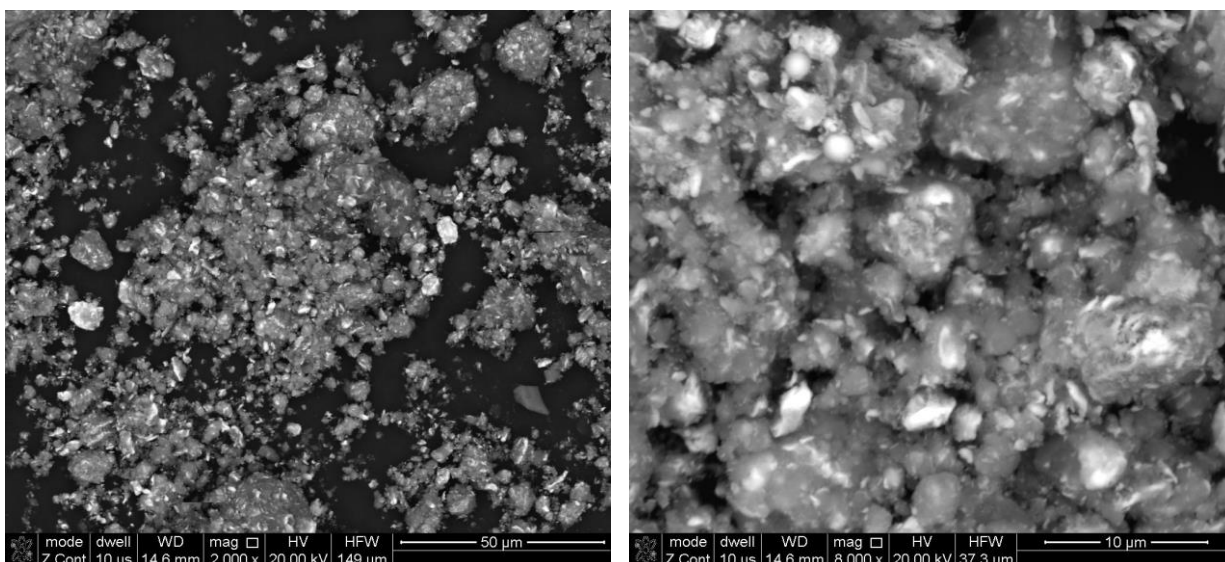

Figure 16S. SEM images of  $\text{MgH}_2+\text{Fe}$  powders milled for 3h and sintered at 300 °C under hydrogen pressure.

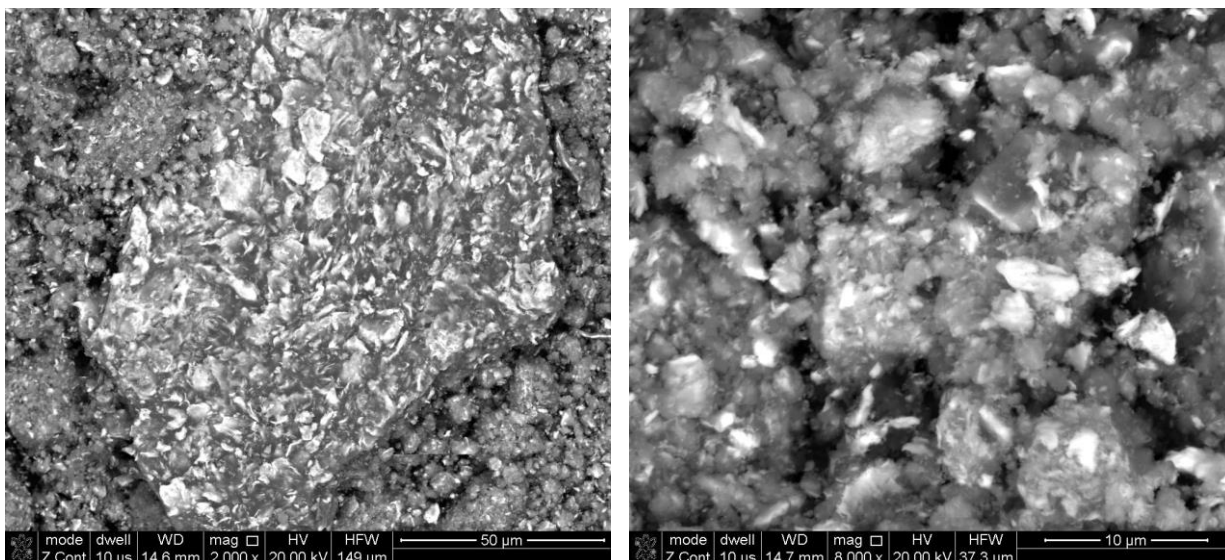

Figure 17S. SEM images of  $\text{MgH}_2+\text{Fe}$  powders milled for 3h and sintered at 350 °C under hydrogen pressure.

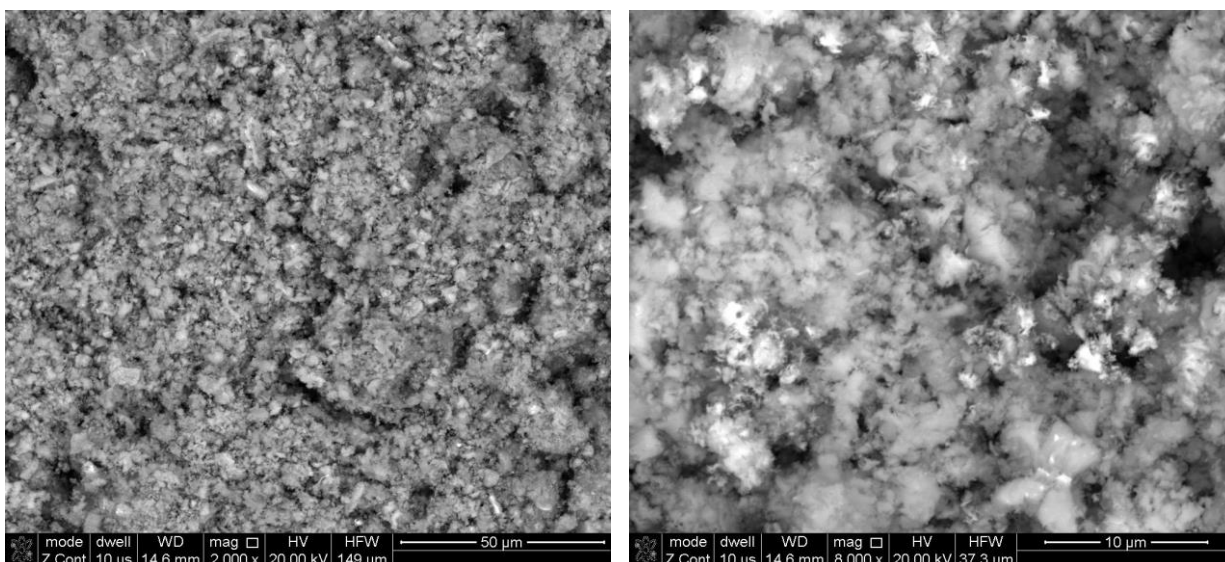

Figure 18S. SEM images of  $\text{MgH}_2+\text{Fe}$  powders milled for 3h and sintered at 400 °C under hydrogen pressure.

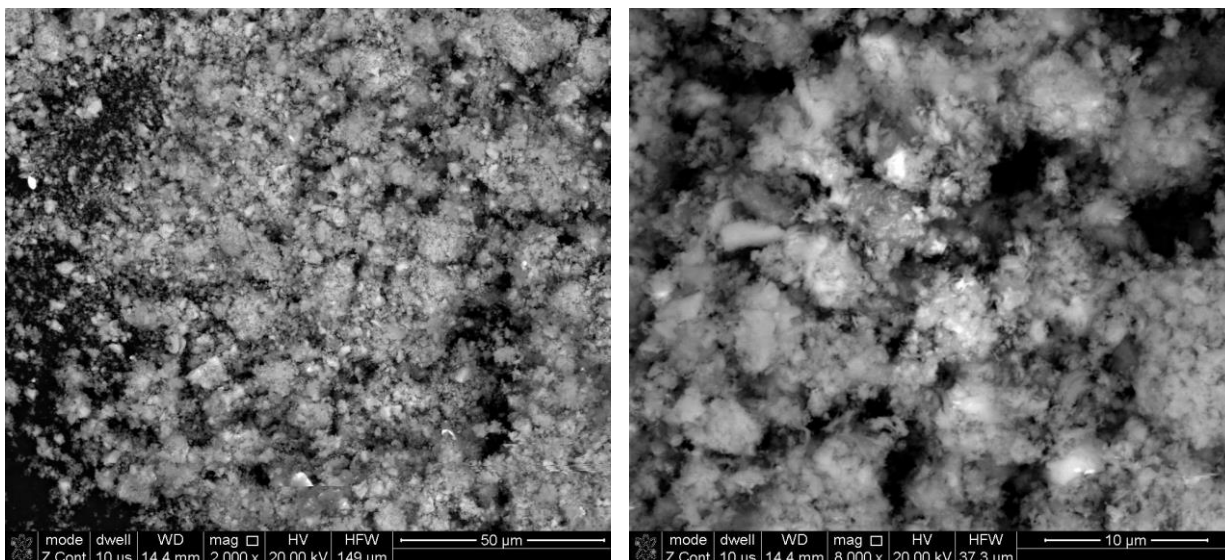

Figure 19S. SEM images of  $\text{MgH}_2+\text{Fe}$  powders milled for 3h and sintered at 450 °C under hydrogen pressure.

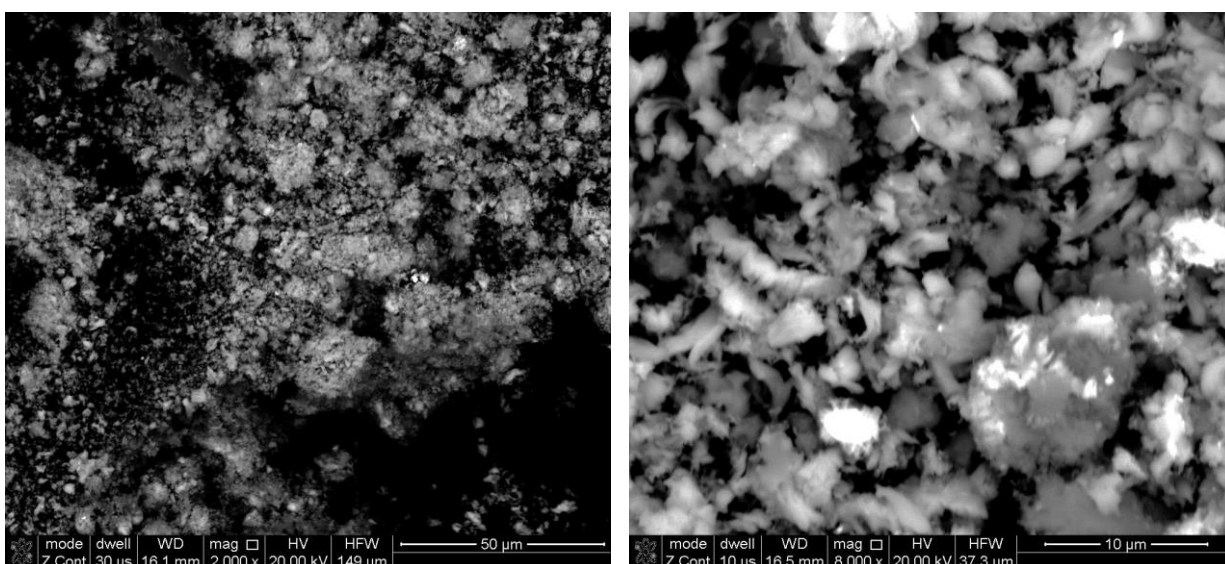

Figure 20S. SEM images of  $\text{MgH}_2+\text{Fe}$  powders milled for 3h and sintered at 500 °C under hydrogen pressure.
